# Supplementary material for: Climate model downscaling in central Asia: a dynamical and a neural network approach
Source: Copernicus journal article supplement (doi:10.5194/gmd-18-161-2025), 2025-01-15
Supplement: Supplementary file 1 [file gmd-18-161-2025-supplement.pdf]

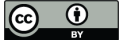

*Supplement of*

## **Climate model downscaling in central Asia: a dynamical and a neural network approach**

**Bijan Fallah et al.**

*Correspondence to:* Bijan Fallah (fallah@pik-potsdam.de, fallah@dkrz.de)

The copyright of individual parts of the supplement might differ from the article licence.

# List of CMIP6 simulations used

## SSP126 (158 simulations)

['CAM5-CSM1-0\_CAM5\_r2i1p1f1\_gn\_ssp126', 'CESM2-WACCM\_NCAR\_r1i1p1f1\_gn\_ssp126', 'CMCC-CM2-SR5\_CMCC\_r1i1p1f1\_gn\_ssp126', 'CMCC-ESM2\_CMCC\_r1i1p1f1\_gn\_ssp126', 'CNRM-CM6-1\_CNRM-CERFACS\_r1i1p1f2\_gr\_ssp126', 'CNRM-ESM2-1\_CNRM-CERFACS\_r1i1p1f2\_gr\_ssp126', 'CanESM5\_CCCma\_r10i1p1f1\_gn\_ssp126', 'CanESM5\_CCCma\_r10i1p2f1\_gn\_ssp126', 'CanESM5\_CCCma\_r11i1p1f1\_gn\_ssp126', 'CanESM5\_CCCma\_r11i1p2f1\_gn\_ssp126', 'CanESM5\_CCCma\_r12i1p1f1\_gn\_ssp126', 'CanESM5\_CCCma\_r12i1p2f1\_gn\_ssp126', 'CanESM5\_CCCma\_r13i1p1f1\_gn\_ssp126', 'CanESM5\_CCCma\_r13i1p2f1\_gn\_ssp126', 'CanESM5\_CCCma\_r14i1p1f1\_gn\_ssp126', 'CanESM5\_CCCma\_r14i1p2f1\_gn\_ssp126', 'CanESM5\_CCCma\_r15i1p1f1\_gn\_ssp126', 'CanESM5\_CCCma\_r15i1p2f1\_gn\_ssp126', 'CanESM5\_CCCma\_r16i1p1f1\_gn\_ssp126', 'CanESM5\_CCCma\_r16i1p2f1\_gn\_ssp126', 'CanESM5\_CCCma\_r17i1p1f1\_gn\_ssp126', 'CanESM5\_CCCma\_r17i1p2f1\_gn\_ssp126', 'CanESM5\_CCCma\_r18i1p1f1\_gn\_ssp126', 'CanESM5\_CCCma\_r18i1p2f1\_gn\_ssp126', 'CanESM5\_CCCma\_r19i1p1f1\_gn\_ssp126', 'CanESM5\_CCCma\_r19i1p2f1\_gn\_ssp126', 'CanESM5\_CCCma\_r1i1p1f1\_gn\_ssp126', 'CanESM5\_CCCma\_r1i1p2f1\_gn\_ssp126', 'CanESM5\_CCCma\_r20i1p1f1\_gn\_ssp126', 'CanESM5\_CCCma\_r20i1p2f1\_gn\_ssp126', 'CanESM5\_CCCma\_r21i1p1f1\_gn\_ssp126', 'CanESM5\_CCCma\_r21i1p2f1\_gn\_ssp126', 'CanESM5\_CCCma\_r22i1p1f1\_gn\_ssp126', 'CanESM5\_CCCma\_r22i1p2f1\_gn\_ssp126', 'CanESM5\_CCCma\_r23i1p1f1\_gn\_ssp126', 'CanESM5\_CCCma\_r23i1p2f1\_gn\_ssp126', 'CanESM5\_CCCma\_r24i1p1f1\_gn\_ssp126', 'CanESM5\_CCCma\_r24i1p2f1\_gn\_ssp126', 'CanESM5\_CCCma\_r25i1p1f1\_gn\_ssp126', 'CanESM5\_CCCma\_r25i1p2f1\_gn\_ssp126', 'CanESM5\_CCCma\_r2i1p1f1\_gn\_ssp126', 'CanESM5\_CCCma\_r2i1p2f1\_gn\_ssp126', 'CanESM5\_CCCma\_r3i1p1f1\_gn\_ssp126', 'CanESM5\_CCCma\_r3i1p2f1\_gn\_ssp126', 'CanESM5\_CCCma\_r4i1p1f1\_gn\_ssp126', 'CanESM5\_CCCma\_r4i1p2f1\_gn\_ssp126', 'CanESM5\_CCCma\_r5i1p1f1\_gn\_ssp126', 'CanESM5\_CCCma\_r5i1p2f1\_gn\_ssp126', 'CanESM5\_CCCma\_r6i1p1f1\_gn\_ssp126', 'CanESM5\_CCCma\_r6i1p2f1\_gn\_ssp126', 'CanESM5\_CCCma\_r7i1p1f1\_gn\_ssp126', 'CanESM5\_CCCma\_r7i1p2f1\_gn\_ssp126', 'CanESM5\_CCCma\_r8i1p1f1\_gn\_ssp126', 'CanESM5\_CCCma\_r8i1p2f1\_gn\_ssp126', 'CanESM5\_CCCma\_r9i1p1f1\_gn\_ssp126', 'CanESM5\_CCCma\_r9i1p2f1\_gn\_ssp126', 'EC-Earth3-Veg-LR\_EC-Earth-Consortium\_r1i1p1f1\_gr\_ssp126', 'EC-Earth3-Veg-LR\_EC-Earth-Consortium\_r2i1p1f1\_gr\_ssp126', 'EC-Earth3-Veg-LR\_EC-Earth-Consortium\_r3i1p1f1\_gr\_ssp126', 'EC-Earth3-Veg\_EC-Earth-Consortium\_r12i1p1f1\_gr\_ssp126', 'EC-Earth3-Veg\_EC-Earth-Consortium\_r14i1p1f1\_gr\_ssp126', 'EC-Earth3\_EC-Earth-Consortium\_r6i1p1f1\_gr\_ssp126', 'GFDL-ESM4\_NOAA-GFDL\_r1i1p1f1\_gr1\_ssp126', 'HadGEM3-GC31-LL\_MOHC\_r1i1p1f3\_gn\_ssp126', 'IITM-ESM\_CCCR-IITM\_r1i1p1f1\_gn\_ssp126', 'INM-CM4-8\_INM\_r1i1p1f1\_gr1\_ssp126', 'INM-CM5-0\_INM\_r1i1p1f1\_gr1\_ssp126', 'IPSL-CM6A-LR\_IPSL\_r14i1p1f1\_gr\_ssp126', 'IPSL-CM6A-LR\_IPSL\_r1i1p1f1\_gr\_ssp126', 'IPSL-CM6A-LR\_IPSL\_r2i1p1f1\_gr\_ssp126', 'IPSL-CM6A-LR\_IPSL\_r3i1p1f1\_gr\_ssp126', 'IPSL-CM6A-LR\_IPSL\_r4i1p1f1\_gr\_ssp126', 'IPSL-CM6A-LR\_IPSL\_r6i1p1f1\_gr\_ssp126', 'KACE-1-0-G\_NIMS-KMA\_r1i1p1f1\_gr\_ssp126', 'KACE-1-0-G\_NIMS-

KMA\_r2i1p1f1\_gr\_ssp126', 'KACE-1-0-G\_NIMS-KMA\_r3i1p1f1\_gr\_ssp126', 'KIOST-ESM\_KIOST\_r1i1p1f1\_gr1\_ssp126', 'MIROC6\_MIROC\_r10i1p1f1\_gn\_ssp126', 'MIROC6\_MIROC\_r11i1p1f1\_gn\_ssp126', 'MIROC6\_MIROC\_r12i1p1f1\_gn\_ssp126', 'MIROC6\_MIROC\_r13i1p1f1\_gn\_ssp126', 'MIROC6\_MIROC\_r14i1p1f1\_gn\_ssp126', 'MIROC6\_MIROC\_r15i1p1f1\_gn\_ssp126', 'MIROC6\_MIROC\_r16i1p1f1\_gn\_ssp126', 'MIROC6\_MIROC\_r17i1p1f1\_gn\_ssp126', 'MIROC6\_MIROC\_r18i1p1f1\_gn\_ssp126', 'MIROC6\_MIROC\_r19i1p1f1\_gn\_ssp126', 'MIROC6\_MIROC\_r1i1p1f1\_gn\_ssp126', 'MIROC6\_MIROC\_r20i1p1f1\_gn\_ssp126', 'MIROC6\_MIROC\_r21i1p1f1\_gn\_ssp126', 'MIROC6\_MIROC\_r22i1p1f1\_gn\_ssp126', 'MIROC6\_MIROC\_r23i1p1f1\_gn\_ssp126', 'MIROC6\_MIROC\_r24i1p1f1\_gn\_ssp126', 'MIROC6\_MIROC\_r25i1p1f1\_gn\_ssp126', 'MIROC6\_MIROC\_r26i1p1f1\_gn\_ssp126', 'MIROC6\_MIROC\_r27i1p1f1\_gn\_ssp126', 'MIROC6\_MIROC\_r28i1p1f1\_gn\_ssp126', 'MIROC6\_MIROC\_r29i1p1f1\_gn\_ssp126', 'MIROC6\_MIROC\_r2i1p1f1\_gn\_ssp126', 'MIROC6\_MIROC\_r30i1p1f1\_gn\_ssp126', 'MIROC6\_MIROC\_r31i1p1f1\_gn\_ssp126', 'MIROC6\_MIROC\_r32i1p1f1\_gn\_ssp126', 'MIROC6\_MIROC\_r33i1p1f1\_gn\_ssp126', 'MIROC6\_MIROC\_r34i1p1f1\_gn\_ssp126', 'MIROC6\_MIROC\_r35i1p1f1\_gn\_ssp126', 'MIROC6\_MIROC\_r36i1p1f1\_gn\_ssp126', 'MIROC6\_MIROC\_r37i1p1f1\_gn\_ssp126', 'MIROC6\_MIROC\_r38i1p1f1\_gn\_ssp126', 'MIROC6\_MIROC\_r39i1p1f1\_gn\_ssp126', 'MIROC6\_MIROC\_r3i1p1f1\_gn\_ssp126', 'MIROC6\_MIROC\_r40i1p1f1\_gn\_ssp126', 'MIROC6\_MIROC\_r41i1p1f1\_gn\_ssp126', 'MIROC6\_MIROC\_r42i1p1f1\_gn\_ssp126', 'MIROC6\_MIROC\_r43i1p1f1\_gn\_ssp126', 'MIROC6\_MIROC\_r44i1p1f1\_gn\_ssp126', 'MIROC6\_MIROC\_r45i1p1f1\_gn\_ssp126', 'MIROC6\_MIROC\_r46i1p1f1\_gn\_ssp126', 'MIROC6\_MIROC\_r47i1p1f1\_gn\_ssp126', 'MIROC6\_MIROC\_r48i1p1f1\_gn\_ssp126', 'MIROC6\_MIROC\_r49i1p1f1\_gn\_ssp126', 'MIROC6\_MIROC\_r4i1p1f1\_gn\_ssp126', 'MIROC6\_MIROC\_r50i1p1f1\_gn\_ssp126', 'MIROC6\_MIROC\_r5i1p1f1\_gn\_ssp126', 'MIROC6\_MIROC\_r6i1p1f1\_gn\_ssp126', 'MIROC6\_MIROC\_r7i1p1f1\_gn\_ssp126', 'MIROC6\_MIROC\_r8i1p1f1\_gn\_ssp126', 'MIROC6\_MIROC\_r9i1p1f1\_gn\_ssp126', 'MPI-ESM1-2-LR\_MPI-M\_r10i1p1f1\_gn\_ssp126', 'MPI-ESM1-2-LR\_MPI-M\_r1i1p1f1\_gn\_ssp126', 'MPI-ESM1-2-LR\_MPI-M\_r2i1p1f1\_gn\_ssp126', 'MPI-ESM1-2-LR\_MPI-M\_r3i1p1f1\_gn\_ssp126', 'MPI-ESM1-2-LR\_MPI-M\_r4i1p1f1\_gn\_ssp126', 'MPI-ESM1-2-LR\_MPI-M\_r5i1p1f1\_gn\_ssp126', 'MPI-ESM1-2-LR\_MPI-M\_r6i1p1f1\_gn\_ssp126', 'MPI-ESM1-2-LR\_MPI-M\_r7i1p1f1\_gn\_ssp126', 'MPI-ESM1-2-LR\_MPI-M\_r8i1p1f1\_gn\_ssp126', 'MPI-ESM1-2-LR\_MPI-M\_r9i1p1f1\_gn\_ssp126', 'MRI-ESM2-0\_MRI\_r1i1p1f1\_gn\_ssp126', 'MRI-ESM2-0\_MRI\_r2i1p1f1\_gn\_ssp126', 'MRI-ESM2-0\_MRI\_r3i1p1f1\_gn\_ssp126', 'MRI-ESM2-0\_MRI\_r4i1p1f1\_gn\_ssp126', 'MRI-ESM2-0\_MRI\_r5i1p1f1\_gn\_ssp126', 'NESM3\_NUIST\_r1i1p1f1\_gn\_ssp126', 'NESM3\_NUIST\_r2i1p1f1\_gn\_ssp126', 'NorESM2-MM\_NCC\_r1i1p1f1\_gn\_ssp126', 'UKESM1-0-LL\_MOHC\_r10i1p1f2\_gn\_ssp126', 'UKESM1-0-LL\_MOHC\_r11i1p1f2\_gn\_ssp126', 'UKESM1-0-LL\_MOHC\_r12i1p1f2\_gn\_ssp126', 'UKESM1-0-LL\_MOHC\_r16i1p1f2\_gn\_ssp126', 'UKESM1-0-LL\_MOHC\_r17i1p1f2\_gn\_ssp126', 'UKESM1-0-LL\_MOHC\_r18i1p1f2\_gn\_ssp126', 'UKESM1-0-LL\_MOHC\_r19i1p1f2\_gn\_ssp126', 'UKESM1-0-LL\_MOHC\_r1i1p1f2\_gn\_ssp126', 'UKESM1-0-LL\_MOHC\_r2i1p1f2\_gn\_ssp126', 'UKESM1-0-LL\_MOHC\_r3i1p1f2\_gn\_ssp126', 'UKESM1-0-LL\_MOHC\_r4i1p1f2\_gn\_ssp126', 'UKESM1-0-LL\_MOHC\_r8i1p1f2\_gn\_ssp126', 'UKESM1-0-LL\_MOHC\_r9i1p1f2\_gn\_ssp126']

## SSP370 (185 simulations)

['CanESM5\_CCCma\_r8i1p2f1\_gn\_ssp370', 'FGOALS-g3\_CAS\_r3i1p1f1\_gn\_ssp370', 'IPSL-CM6A-LR\_IPSL\_r6i1p1f1\_gr\_ssp370', 'IITM-ESM\_CCCR-IITM\_r1i1p1f1\_gn\_ssp370', 'MPI-ESM1-2-LR\_MPI-M\_r8i1p1f1\_gn\_ssp370', 'EC-Earth3-Veg-LR\_EC-Earth-Consortium\_r2i1p1f1\_gr\_ssp370', 'EC-Earth3\_EC-Earth-Consortium\_r12i1p1f1\_gr\_ssp370', 'CMCC-ESM2\_CMCC\_r1i1p1f1\_gn\_ssp370', 'EC-Earth3\_EC-Earth-Consortium\_r116i1p1f1\_gr\_ssp370', 'INM-CM5-0\_INM\_r3i1p1f1\_gr1\_ssp370', 'EC-Earth3\_EC-Earth-Consortium\_r110i1p1f1\_gr\_ssp370', 'CanESM5\_CCCma\_r16i1p1f1\_gn\_ssp370', 'CanESM5\_CCCma\_r20i1p1f1\_gn\_ssp370', 'MPI-ESM1-2-LR\_MPI-M\_r3i1p1f1\_gn\_ssp370', 'CanESM5\_CCCma\_r17i1p1f1\_gn\_ssp370', 'MRI-ESM2-0\_MRI\_r4i1p1f1\_gn\_ssp370', 'CanESM5\_CCCma\_r14i1p2f1\_gn\_ssp370', 'IPSL-CM6A-LR\_IPSL\_r3i1p1f1\_gr\_ssp370', 'EC-Earth3\_EC-Earth-Consortium\_r140i1p1f1\_gr\_ssp370', 'IPSL-CM6A-LR\_IPSL\_r5i1p1f1\_gr\_ssp370', 'CanESM5\_CCCma\_r1i1p1f1\_gn\_ssp370', 'CanESM5\_CCCma\_r21i1p2f1\_gn\_ssp370', 'CanESM5\_CCCma\_r24i1p2f1\_gn\_ssp370', 'IPSL-CM6A-LR\_IPSL\_r14i1p1f1\_gr\_ssp370', 'EC-Earth3\_EC-Earth-Consortium\_r137i1p1f1\_gr\_ssp370', 'UKESM1-0-LL\_MOHC\_r3i1p1f2\_gn\_ssp370', 'MPI-ESM1-2-LR\_MPI-M\_r10i1p1f1\_gn\_ssp370', 'EC-Earth3-AerChem\_EC-Earth-Consortium\_r1i1p1f1\_gr\_ssp370', 'EC-Earth3\_EC-Earth-Consortium\_r107i1p1f1\_gr\_ssp370', 'CanESM5\_CCCma\_r3i1p2f1\_gn\_ssp370', 'EC-Earth3\_EC-Earth-Consortium\_r115i1p1f1\_gr\_ssp370', 'CanESM5\_CCCma\_r12i1p1f1\_gn\_ssp370', 'CanESM5\_CCCma\_r8i1p1f1\_gn\_ssp370', 'IPSL-CM6A-LR\_IPSL\_r8i1p1f1\_gr\_ssp370', 'EC-Earth3\_EC-Earth-Consortium\_r113i1p1f1\_gr\_ssp370', 'CanESM5\_CCCma\_r9i1p2f1\_gn\_ssp370', 'KACE-1-0-G\_NIMS-KMA\_r3i1p1f1\_gr\_ssp370', 'CanESM5\_CCCma\_r19i1p2f1\_gn\_ssp370', 'CanESM5\_CCCma\_r25i1p2f1\_gn\_ssp370', 'EC-Earth3-Veg\_EC-Earth-Consortium\_r2i1p1f1\_gr\_ssp370', 'UKESM1-0-LL\_MOHC\_r18i1p1f2\_gn\_ssp370', 'GFDL-ESM4\_NOAA-GFDL\_r1i1p1f1\_gr1\_ssp370', 'CanESM5\_CCCma\_r18i1p2f1\_gn\_ssp370', 'EC-Earth3\_EC-Earth-Consortium\_r117i1p1f1\_gr\_ssp370', 'CanESM5\_CCCma\_r15i1p2f1\_gn\_ssp370', 'CanESM5\_CCCma\_r11i1p2f1\_gn\_ssp370', 'CanESM5\_CCCma\_r23i1p1f1\_gn\_ssp370', 'CESM2-WACCM\_NCAR\_r1i1p1f1\_gn\_ssp370', 'CanESM5\_CCCma\_r22i1p1f1\_gn\_ssp370', 'CESM2\_NCAR\_r11i1p1f1\_gn\_ssp370', 'NorESM2-LM\_NCC\_r1i1p1f1\_gn\_ssp370', 'EC-Earth3\_EC-Earth-Consortium\_r148i1p1f1\_gr\_ssp370', 'CanESM5\_CCCma\_r5i1p2f1\_gn\_ssp370', 'CanESM5\_CCCma\_r13i1p2f1\_gn\_ssp370', 'EC-Earth3\_EC-Earth-Consortium\_r123i1p1f1\_gr\_ssp370', 'CanESM5\_CCCma\_r24i1p1f1\_gn\_ssp370', 'EC-Earth3\_EC-Earth-Consortium\_r125i1p1f1\_gr\_ssp370', 'EC-Earth3\_EC-Earth-Consortium\_r139i1p1f1\_gr\_ssp370', 'CanESM5\_CCCma\_r25i1p1f1\_gn\_ssp370', 'EC-Earth3\_EC-Earth-Consortium\_r136i1p1f1\_gr\_ssp370', 'EC-Earth3\_EC-Earth-Consortium\_r141i1p1f1\_gr\_ssp370', 'IPSL-CM6A-LR\_IPSL\_r9i1p1f1\_gr\_ssp370', 'MPI-ESM1-2-LR\_MPI-M\_r7i1p1f1\_gn\_ssp370', 'EC-Earth3\_EC-Earth-Consortium\_r15i1p1f1\_gr\_ssp370', 'FGOALS-g3\_CAS\_r5i1p1f1\_gn\_ssp370', 'EC-Earth3\_EC-Earth-Consortium\_r135i1p1f1\_gr\_ssp370', 'UKESM1-0-LL\_MOHC\_r11i1p1f2\_gn\_ssp370', 'KACE-1-0-G\_NIMS-KMA\_r2i1p1f1\_gr\_ssp370', 'EC-Earth3\_EC-Earth-Consortium\_r13i1p1f1\_gr\_ssp370', 'MIROC6\_MIROC\_r3i1p1f1\_gn\_ssp370', 'MRI-ESM2-0\_MRI\_r2i1p1f1\_gn\_ssp370', 'EC-Earth3\_EC-Earth-Consortium\_r111i1p1f1\_gr\_ssp370', 'EC-Earth3\_EC-Earth-Consortium\_r145i1p1f1\_gr\_ssp370', 'MPI-ESM1-2-LR\_MPI-M\_r2i1p1f1\_gn\_ssp370', 'UKESM1-0-LL\_MOHC\_r12i1p1f2\_gn\_ssp370', 'CanESM5\_CCCma\_r15i1p1f1\_gn\_ssp370', 'EC-Earth3\_EC-Earth-Consortium\_r150i1p1f1\_gr\_ssp370', 'MRI-ESM2-0\_MRI\_r3i1p1f1\_gn\_ssp370', 'EC-Earth3\_EC-Earth-Consortium\_r143i1p1f1\_gr\_ssp370', 'MRI-ESM2-0\_MRI\_r5i1p1f1\_gn\_ssp370', 'CAM5-CSM1-0\_CAM5\_r2i1p1f1\_gn\_ssp370', 'INM-CM5-0\_INM\_r2i1p1f1\_gr1\_ssp370',

'CanESM5\_CCCma\_r4i1p1f1\_gn\_ssp370', 'EC-Earth3\_EC-Earth-Consortium\_r132i1p1f1\_gr\_ssp370',  
'CanESM5\_CCCma\_r4i1p2f1\_gn\_ssp370', 'KACE-1-0-G\_NIMS-KMA\_r1i1p1f1\_gr\_ssp370', 'MRI-ESM2-  
0\_MRI\_r1i1p1f1\_gn\_ssp370', 'CanESM5\_CCCma\_r7i1p2f1\_gn\_ssp370',  
'CanESM5\_CCCma\_r5i1p1f1\_gn\_ssp370', 'EC-Earth3\_EC-Earth-Consortium\_r130i1p1f1\_gr\_ssp370', 'EC-  
Earth3\_EC-Earth-Consortium\_r122i1p1f1\_gr\_ssp370', 'CanESM5\_CCCma\_r18i1p1f1\_gn\_ssp370', 'EC-  
Earth3\_EC-Earth-Consortium\_r109i1p1f1\_gr\_ssp370', 'CNRM-CM6-1\_CNRM-  
CERFACS\_r1i1p1f2\_gr\_ssp370', 'MPI-ESM1-2-LR\_MPI-M\_r9i1p1f1\_gn\_ssp370', 'UKESM1-0-  
LL\_MOHC\_r17i1p1f2\_gn\_ssp370', 'ACCESS-CM2\_CSIRO-ARCCSS\_r2i1p1f1\_gn\_ssp370', 'IPSL-CM6A-  
LR\_IPSL\_r7i1p1f1\_gr\_ssp370', 'MPI-ESM1-2-LR\_MPI-M\_r1i1p1f1\_gn\_ssp370', 'IPSL-CM6A-  
LR\_IPSL\_r4i1p1f1\_gr\_ssp370', 'EC-Earth3\_EC-Earth-Consortium\_r11i1p1f1\_gr\_ssp370', 'UKESM1-0-  
LL\_MOHC\_r2i1p1f2\_gn\_ssp370', 'CanESM5\_CCCma\_r2i1p1f1\_gn\_ssp370', 'EC-Earth3\_EC-Earth-  
Consortium\_r106i1p1f1\_gr\_ssp370', 'CanESM5\_CCCma\_r7i1p1f1\_gn\_ssp370', 'IPSL-CM6A-  
LR\_IPSL\_r10i1p1f1\_gr\_ssp370', 'CESM2\_NCAR\_r4i1p1f1\_gn\_ssp370',  
'CanESM5\_CCCma\_r22i1p2f1\_gn\_ssp370', 'EC-Earth3\_EC-Earth-Consortium\_r105i1p1f1\_gr\_ssp370',  
'IPSL-CM6A-LR\_IPSL\_r1i1p1f1\_gr\_ssp370', 'IPSL-CM6A-LR\_IPSL\_r2i1p1f1\_gr\_ssp370', 'EC-Earth3\_EC-  
Earth-Consortium\_r108i1p1f1\_gr\_ssp370', 'INM-CM4-8\_INM\_r1i1p1f1\_gr1\_ssp370', 'EC-Earth3\_EC-  
Earth-Consortium\_r120i1p1f1\_gr\_ssp370', 'CanESM5\_CCCma\_r2i1p2f1\_gn\_ssp370', 'EC-Earth3\_EC-  
Earth-Consortium\_r126i1p1f1\_gr\_ssp370', 'CanESM5\_CCCma\_r1i1p2f1\_gn\_ssp370',  
'CanESM5\_CCCma\_r14i1p1f1\_gn\_ssp370', 'CanESM5\_CCCma\_r16i1p2f1\_gn\_ssp370', 'UKESM1-0-  
LL\_MOHC\_r10i1p1f2\_gn\_ssp370', 'EC-Earth3\_EC-Earth-Consortium\_r138i1p1f1\_gr\_ssp370', 'EC-  
Earth3\_EC-Earth-Consortium\_r129i1p1f1\_gr\_ssp370', 'EC-Earth3\_EC-Earth-  
Consortium\_r1i1p1f1\_gr\_ssp370', 'EC-Earth3\_EC-Earth-Consortium\_r101i1p1f1\_gr\_ssp370', 'EC-  
Earth3\_EC-Earth-Consortium\_r6i1p1f1\_gr\_ssp370', 'UKESM1-0-LL\_MOHC\_r16i1p1f2\_gn\_ssp370',  
'CanESM5\_CCCma\_r20i1p2f1\_gn\_ssp370', 'ACCESS-CM2\_CSIRO-ARCCSS\_r3i1p1f1\_gn\_ssp370', 'EC-  
Earth3\_EC-Earth-Consortium\_r133i1p1f1\_gr\_ssp370', 'UKESM1-0-LL\_MOHC\_r19i1p1f2\_gn\_ssp370', 'EC-  
Earth3-Veg\_EC-Earth-Consortium\_r3i1p1f1\_gr\_ssp370', 'FGOALS-g3\_CAS\_r1i1p1f1\_gn\_ssp370',  
'CanESM5\_CCCma\_r10i1p1f1\_gn\_ssp370', 'CanESM5\_CCCma\_r9i1p1f1\_gn\_ssp370', 'EC-Earth3\_EC-  
Earth-Consortium\_r112i1p1f1\_gr\_ssp370', 'MIROC6\_MIROC\_r2i1p1f1\_gn\_ssp370', 'CMCC-CM2-  
SR5\_CMCC\_r1i1p1f1\_gn\_ssp370', 'EC-Earth3\_EC-Earth-Consortium\_r131i1p1f1\_gr\_ssp370', 'UKESM1-0-  
LL\_MOHC\_r1i1p1f2\_gn\_ssp370', 'EC-Earth3\_EC-Earth-Consortium\_r142i1p1f1\_gr\_ssp370', 'INM-CM5-  
0\_INM\_r4i1p1f1\_gr1\_ssp370', 'CanESM5\_CCCma\_r11i1p1f1\_gn\_ssp370',  
'CanESM5\_CCCma\_r3i1p1f1\_gn\_ssp370', 'INM-CM5-0\_INM\_r1i1p1f1\_gr1\_ssp370', 'IPSL-CM5A2-  
INCA\_IPSL\_r1i1p1f1\_gr\_ssp370', 'EC-Earth3\_EC-Earth-Consortium\_r118i1p1f1\_gr\_ssp370', 'MPI-ESM1-  
2-LR\_MPI-M\_r5i1p1f1\_gn\_ssp370', 'EC-Earth3\_EC-Earth-Consortium\_r119i1p1f1\_gr\_ssp370',  
'CanESM5\_CCCma\_r6i1p2f1\_gn\_ssp370', 'CanESM5\_CCCma\_r21i1p1f1\_gn\_ssp370', 'EC-Earth3\_EC-  
Earth-Consortium\_r127i1p1f1\_gr\_ssp370', 'EC-Earth3\_EC-Earth-Consortium\_r104i1p1f1\_gr\_ssp370',  
'EC-Earth3-Veg-LR\_EC-Earth-Consortium\_r3i1p1f1\_gr\_ssp370', 'CanESM5\_CCCma\_r6i1p1f1\_gn\_ssp370',  
'CNRM-ESM2-1\_CNRM-CERFACS\_r1i1p1f2\_gr\_ssp370', 'EC-Earth3-Veg\_EC-Earth-  
Consortium\_r4i1p1f1\_gr\_ssp370', 'EC-Earth3\_EC-Earth-Consortium\_r102i1p1f1\_gr\_ssp370', 'EC-  
Earth3\_EC-Earth-Consortium\_r128i1p1f1\_gr\_ssp370', 'EC-Earth3\_EC-Earth-  
Consortium\_r103i1p1f1\_gr\_ssp370', 'EC-Earth3\_EC-Earth-Consortium\_r134i1p1f1\_gr\_ssp370', 'INM-  
CM5-0\_INM\_r5i1p1f1\_gr1\_ssp370', 'CanESM5\_CCCma\_r19i1p1f1\_gn\_ssp370',  
'MIROC6\_MIROC\_r1i1p1f1\_gn\_ssp370', 'MPI-ESM1-2-LR\_MPI-M\_r6i1p1f1\_gn\_ssp370', 'EC-Earth3\_EC-  
Earth-Consortium\_r146i1p1f1\_gr\_ssp370', 'EC-Earth3\_EC-Earth-Consortium\_r124i1p1f1\_gr\_ssp370',

'CanESM5\_CCCma\_r23i1p2f1\_gn\_ssp370', 'UKESM1-0-LL\_MOHC\_r4i1p1f2\_gn\_ssp370', 'UKESM1-0-LL\_MOHC\_r8i1p1f2\_gn\_ssp370', 'CanESM5\_CCCma\_r17i1p2f1\_gn\_ssp370', 'CanESM5\_CCCma\_r10i1p2f1\_gn\_ssp370', 'MPI-ESM1-2-LR\_MPI-M\_r4i1p1f1\_gn\_ssp370', 'CanESM5\_CCCma\_r13i1p1f1\_gn\_ssp370', 'MIROC-ES2L\_MIROC\_r1i1p1f2\_gn\_ssp370', 'CanESM5\_CCCma\_r12i1p2f1\_gn\_ssp370', 'EC-Earth3\_EC-Earth-Consortium\_r144i1p1f1\_gr\_ssp370', 'EC-Earth3\_EC-Earth-Consortium\_r4i1p1f1\_gr\_ssp370', 'EC-Earth3\_EC-Earth-Consortium\_r147i1p1f1\_gr\_ssp370', 'EC-Earth3\_EC-Earth-Consortium\_r149i1p1f1\_gr\_ssp370', 'EC-Earth3\_EC-Earth-Consortium\_r114i1p1f1\_gr\_ssp370', 'UKESM1-0-LL\_MOHC\_r9i1p1f2\_gn\_ssp370', 'ACCESS-CM2\_CSIRO-ARCCSS\_r1i1p1f1\_gn\_ssp370', 'EC-Earth3-Veg-LR\_EC-Earth-Consortium\_r1i1p1f1\_gr\_ssp370', 'EC-Earth3\_EC-Earth-Consortium\_r9i1p1f1\_gr\_ssp370', 'NorESM2-MM\_NCC\_r1i1p1f1\_gn\_ssp370']

## SSP585 (242 simulations)

['ACCESS-CM2\_CSIRO-ARCCSS\_r2i1p1f1\_gn\_ssp585', 'ACCESS-CM2\_CSIRO-ARCCSS\_r3i1p1f1\_gn\_ssp585', 'ACCESS-CM2\_CSIRO-ARCCSS\_r4i1p1f1\_gn\_ssp585', 'ACCESS-CM2\_CSIRO-ARCCSS\_r5i1p1f1\_gn\_ssp585', 'ACCESS-ESM1-5\_CSIRO\_r1i1p1f1\_gn\_ssp585', 'ACCESS-ESM1-5\_CSIRO\_r2i1p1f1\_gn\_ssp585', 'ACCESS-ESM1-5\_CSIRO\_r5i1p1f1\_gn\_ssp585', 'ACCESS-ESM1-5\_CSIRO\_r6i1p1f1\_gn\_ssp585', 'ACCESS-ESM1-5\_CSIRO\_r7i1p1f1\_gn\_ssp585', 'ACCESS-ESM1-5\_CSIRO\_r8i1p1f1\_gn\_ssp585', 'ACCESS-ESM1-5\_CSIRO\_r9i1p1f1\_gn\_ssp585', 'CAM5-CSM1-0\_CAM5\_r2i1p1f1\_gn\_ssp585', 'CESM2-WACCM\_NCAR\_r1i1p1f1\_gn\_ssp585', 'CESM2-WACCM\_NCAR\_r2i1p1f1\_gn\_ssp585', 'CESM2-WACCM\_NCAR\_r3i1p1f1\_gn\_ssp585', 'CESM2\_NCAR\_r11i1p1f1\_gn\_ssp585', 'CESM2\_NCAR\_r4i1p1f1\_gn\_ssp585', 'CMCC-CM2-SR5\_CMCC\_r1i1p1f1\_gn\_ssp585', 'CMCC-ESM2\_CMCC\_r1i1p1f1\_gn\_ssp585', 'CNRM-CM6-1-HR\_CNRM-CERFACS\_r1i1p1f2\_gr\_ssp585', 'CNRM-CM6-1\_CNRM-CERFACS\_r1i1p1f2\_gr\_ssp585', 'CNRM-ESM2-1\_CNRM-CERFACS\_r1i1p1f2\_gr\_ssp585', 'CanESM5\_CCCma\_r10i1p1f1\_gn\_ssp585', 'CanESM5\_CCCma\_r10i1p2f1\_gn\_ssp585', 'CanESM5\_CCCma\_r11i1p1f1\_gn\_ssp585', 'CanESM5\_CCCma\_r11i1p2f1\_gn\_ssp585', 'CanESM5\_CCCma\_r12i1p1f1\_gn\_ssp585', 'CanESM5\_CCCma\_r12i1p2f1\_gn\_ssp585', 'CanESM5\_CCCma\_r13i1p1f1\_gn\_ssp585', 'CanESM5\_CCCma\_r13i1p2f1\_gn\_ssp585', 'CanESM5\_CCCma\_r14i1p1f1\_gn\_ssp585', 'CanESM5\_CCCma\_r14i1p2f1\_gn\_ssp585', 'CanESM5\_CCCma\_r15i1p1f1\_gn\_ssp585', 'CanESM5\_CCCma\_r15i1p2f1\_gn\_ssp585', 'CanESM5\_CCCma\_r16i1p1f1\_gn\_ssp585', 'CanESM5\_CCCma\_r16i1p2f1\_gn\_ssp585', 'CanESM5\_CCCma\_r17i1p1f1\_gn\_ssp585', 'CanESM5\_CCCma\_r17i1p2f1\_gn\_ssp585', 'CanESM5\_CCCma\_r18i1p1f1\_gn\_ssp585', 'CanESM5\_CCCma\_r18i1p2f1\_gn\_ssp585', 'CanESM5\_CCCma\_r19i1p1f1\_gn\_ssp585', 'CanESM5\_CCCma\_r19i1p2f1\_gn\_ssp585', 'CanESM5\_CCCma\_r1i1p1f1\_gn\_ssp585', 'CanESM5\_CCCma\_r1i1p2f1\_gn\_ssp585', 'CanESM5\_CCCma\_r20i1p1f1\_gn\_ssp585', 'CanESM5\_CCCma\_r20i1p2f1\_gn\_ssp585', 'CanESM5\_CCCma\_r21i1p1f1\_gn\_ssp585', 'CanESM5\_CCCma\_r21i1p2f1\_gn\_ssp585', 'CanESM5\_CCCma\_r22i1p1f1\_gn\_ssp585', 'CanESM5\_CCCma\_r22i1p2f1\_gn\_ssp585', 'CanESM5\_CCCma\_r23i1p1f1\_gn\_ssp585', 'CanESM5\_CCCma\_r23i1p2f1\_gn\_ssp585', 'CanESM5\_CCCma\_r24i1p1f1\_gn\_ssp585', 'CanESM5\_CCCma\_r24i1p2f1\_gn\_ssp585', 'CanESM5\_CCCma\_r25i1p1f1\_gn\_ssp585', 'CanESM5\_CCCma\_r25i1p2f1\_gn\_ssp585', 'CanESM5\_CCCma\_r2i1p1f1\_gn\_ssp585',



Earth3\_EC-Earth-Consortium\_r144i1p1f1\_gr\_ssp585', 'EC-Earth3\_EC-Earth-Consortium\_r145i1p1f1\_gr\_ssp585', 'EC-Earth3\_EC-Earth-Consortium\_r146i1p1f1\_gr\_ssp585', 'EC-Earth3\_EC-Earth-Consortium\_r147i1p1f1\_gr\_ssp585', 'EC-Earth3\_EC-Earth-Consortium\_r148i1p1f1\_gr\_ssp585', 'EC-Earth3\_EC-Earth-Consortium\_r149i1p1f1\_gr\_ssp585', 'EC-Earth3\_EC-Earth-Consortium\_r150i1p1f1\_gr\_ssp585', 'EC-Earth3\_EC-Earth-Consortium\_r151i1p1f1\_gr\_ssp585', 'EC-Earth3\_EC-Earth-Consortium\_r1i1p1f1\_gr\_ssp585', 'EC-Earth3\_EC-Earth-Consortium\_r4i1p1f1\_gr\_ssp585', 'EC-Earth3\_EC-Earth-Consortium\_r6i1p1f1\_gr\_ssp585', 'EC-Earth3\_EC-Earth-Consortium\_r9i1p1f1\_gr\_ssp585', 'FGOALS-g3\_CAS\_r1i1p1f1\_gn\_ssp585', 'FGOALS-g3\_CAS\_r3i1p1f1\_gn\_ssp585', 'FGOALS-g3\_CAS\_r4i1p1f1\_gn\_ssp585', 'GFDL-CM4\_NOAA-GFDL\_r1i1p1f1\_gr1\_ssp585', 'GFDL-CM4\_NOAA-GFDL\_r1i1p1f1\_gr2\_ssp585', 'GFDL-ESM4\_NOAA-GFDL\_r1i1p1f1\_gr1\_ssp585', 'HadGEM3-GC31-LL\_MOHC\_r1i1p1f3\_gn\_ssp585', 'HadGEM3-GC31-LL\_MOHC\_r2i1p1f3\_gn\_ssp585', 'HadGEM3-GC31-LL\_MOHC\_r3i1p1f3\_gn\_ssp585', 'HadGEM3-GC31-LL\_MOHC\_r4i1p1f3\_gn\_ssp585', 'HadGEM3-GC31-MM\_MOHC\_r1i1p1f3\_gn\_ssp585', 'HadGEM3-GC31-MM\_MOHC\_r2i1p1f3\_gn\_ssp585', 'HadGEM3-GC31-MM\_MOHC\_r3i1p1f3\_gn\_ssp585', 'HadGEM3-GC31-MM\_MOHC\_r4i1p1f3\_gn\_ssp585', 'IITM-ESM\_CCCR-IITM\_r1i1p1f1\_gn\_ssp585', 'INM-CM4-8\_INM\_r1i1p1f1\_gr1\_ssp585', 'INM-CM5-0\_INM\_r1i1p1f1\_gr1\_ssp585', 'IPSL-CM6A-LR\_IPSL\_r14i1p1f1\_gr\_ssp585', 'IPSL-CM6A-LR\_IPSL\_r1i1p1f1\_gr\_ssp585', 'IPSL-CM6A-LR\_IPSL\_r2i1p1f1\_gr\_ssp585', 'IPSL-CM6A-LR\_IPSL\_r3i1p1f1\_gr\_ssp585', 'IPSL-CM6A-LR\_IPSL\_r4i1p1f1\_gr\_ssp585', 'IPSL-CM6A-LR\_IPSL\_r6i1p1f1\_gr\_ssp585', 'KACE-1-0-G\_NIMS-KMA\_r1i1p1f1\_gr\_ssp585', 'KACE-1-0-G\_NIMS-KMA\_r2i1p1f1\_gr\_ssp585', 'KACE-1-0-G\_NIMS-KMA\_r3i1p1f1\_gr\_ssp585', 'KIOST-ESM\_KIOST\_r1i1p1f1\_gr1\_ssp585', 'MIROC6\_MIROC\_r10i1p1f1\_gn\_ssp585', 'MIROC6\_MIROC\_r11i1p1f1\_gn\_ssp585', 'MIROC6\_MIROC\_r12i1p1f1\_gn\_ssp585', 'MIROC6\_MIROC\_r13i1p1f1\_gn\_ssp585', 'MIROC6\_MIROC\_r14i1p1f1\_gn\_ssp585', 'MIROC6\_MIROC\_r15i1p1f1\_gn\_ssp585', 'MIROC6\_MIROC\_r16i1p1f1\_gn\_ssp585', 'MIROC6\_MIROC\_r17i1p1f1\_gn\_ssp585', 'MIROC6\_MIROC\_r18i1p1f1\_gn\_ssp585', 'MIROC6\_MIROC\_r19i1p1f1\_gn\_ssp585', 'MIROC6\_MIROC\_r1i1p1f1\_gn\_ssp585', 'MIROC6\_MIROC\_r20i1p1f1\_gn\_ssp585', 'MIROC6\_MIROC\_r21i1p1f1\_gn\_ssp585', 'MIROC6\_MIROC\_r22i1p1f1\_gn\_ssp585', 'MIROC6\_MIROC\_r23i1p1f1\_gn\_ssp585', 'MIROC6\_MIROC\_r24i1p1f1\_gn\_ssp585', 'MIROC6\_MIROC\_r25i1p1f1\_gn\_ssp585', 'MIROC6\_MIROC\_r26i1p1f1\_gn\_ssp585', 'MIROC6\_MIROC\_r27i1p1f1\_gn\_ssp585', 'MIROC6\_MIROC\_r28i1p1f1\_gn\_ssp585', 'MIROC6\_MIROC\_r29i1p1f1\_gn\_ssp585', 'MIROC6\_MIROC\_r2i1p1f1\_gn\_ssp585', 'MIROC6\_MIROC\_r30i1p1f1\_gn\_ssp585', 'MIROC6\_MIROC\_r31i1p1f1\_gn\_ssp585', 'MIROC6\_MIROC\_r32i1p1f1\_gn\_ssp585', 'MIROC6\_MIROC\_r33i1p1f1\_gn\_ssp585', 'MIROC6\_MIROC\_r34i1p1f1\_gn\_ssp585', 'MIROC6\_MIROC\_r35i1p1f1\_gn\_ssp585', 'MIROC6\_MIROC\_r36i1p1f1\_gn\_ssp585', 'MIROC6\_MIROC\_r37i1p1f1\_gn\_ssp585', 'MIROC6\_MIROC\_r38i1p1f1\_gn\_ssp585', 'MIROC6\_MIROC\_r39i1p1f1\_gn\_ssp585', 'MIROC6\_MIROC\_r3i1p1f1\_gn\_ssp585', 'MIROC6\_MIROC\_r40i1p1f1\_gn\_ssp585', 'MIROC6\_MIROC\_r41i1p1f1\_gn\_ssp585', 'MIROC6\_MIROC\_r42i1p1f1\_gn\_ssp585', 'MIROC6\_MIROC\_r43i1p1f1\_gn\_ssp585', 'MIROC6\_MIROC\_r44i1p1f1\_gn\_ssp585', 'MIROC6\_MIROC\_r45i1p1f1\_gn\_ssp585', 'MIROC6\_MIROC\_r46i1p1f1\_gn\_ssp585', 'MIROC6\_MIROC\_r47i1p1f1\_gn\_ssp585', 'MIROC6\_MIROC\_r48i1p1f1\_gn\_ssp585', 'MIROC6\_MIROC\_r49i1p1f1\_gn\_ssp585', 'MIROC6\_MIROC\_r4i1p1f1\_gn\_ssp585', 'MIROC6\_MIROC\_r50i1p1f1\_gn\_ssp585',



'MIROC6\_MIROC\_r5i1p1f1\_gn\_ssp585', 'MIROC6\_MIROC\_r6i1p1f1\_gn\_ssp585',  
'MIROC6\_MIROC\_r7i1p1f1\_gn\_ssp585', 'MIROC6\_MIROC\_r8i1p1f1\_gn\_ssp585',  
'MIROC6\_MIROC\_r9i1p1f1\_gn\_ssp585', 'MPI-ESM1-2-LR\_MPI-M\_r10i1p1f1\_gn\_ssp585', 'MPI-ESM1-2-  
LR\_MPI-M\_r1i1p1f1\_gn\_ssp585', 'MPI-ESM1-2-LR\_MPI-M\_r2i1p1f1\_gn\_ssp585', 'MPI-ESM1-2-LR\_MPI-  
M\_r3i1p1f1\_gn\_ssp585', 'MPI-ESM1-2-LR\_MPI-M\_r4i1p1f1\_gn\_ssp585', 'MPI-ESM1-2-LR\_MPI-  
M\_r5i1p1f1\_gn\_ssp585', 'MPI-ESM1-2-LR\_MPI-M\_r6i1p1f1\_gn\_ssp585', 'MPI-ESM1-2-LR\_MPI-  
M\_r7i1p1f1\_gn\_ssp585', 'MPI-ESM1-2-LR\_MPI-M\_r8i1p1f1\_gn\_ssp585', 'MPI-ESM1-2-LR\_MPI-  
M\_r9i1p1f1\_gn\_ssp585', 'MRI-ESM2-0\_MRI\_r1i1p1f1\_gn\_ssp585', 'MRI-ESM2-  
0\_MRI\_r1i2p1f1\_gn\_ssp585', 'MRI-ESM2-0\_MRI\_r2i1p1f1\_gn\_ssp585', 'MRI-ESM2-  
0\_MRI\_r3i1p1f1\_gn\_ssp585', 'MRI-ESM2-0\_MRI\_r4i1p1f1\_gn\_ssp585', 'MRI-ESM2-  
0\_MRI\_r5i1p1f1\_gn\_ssp585', 'NESM3\_NUIST\_r1i1p1f1\_gn\_ssp585',  
'NESM3\_NUIST\_r2i1p1f1\_gn\_ssp585', 'NorESM2-LM\_NCC\_r1i1p1f1\_gn\_ssp585', 'NorESM2-  
MM\_NCC\_r1i1p1f1\_gn\_ssp585', 'TaiESM1\_AS-RCEC\_r1i1p1f1\_gn\_ssp585', 'UKESM1-0-  
LL\_MOHC\_r1i1p1f2\_gn\_ssp585', 'UKESM1-0-LL\_MOHC\_r2i1p1f2\_gn\_ssp585', 'UKESM1-0-  
LL\_MOHC\_r3i1p1f2\_gn\_ssp585', 'UKESM1-0-LL\_MOHC\_r4i1p1f2\_gn\_ssp585', 'UKESM1-0-  
LL\_MOHC\_r8i1p1f2\_gn\_ssp585']
